# Supplementary material for: Exploring the Anti-Diabetic Potential of Quercetagitrin through Dual Inhibition of PTPN6 and PTPN9
Source: MDPI journal article supplement (doi:10.3390/nu16050647), 2024-02-25
Supplement: s1 [file s1]

## Supplementary Information

### Quercetagitritin as a dual-targeting inhibitor of PTPN6 and PTPN9 exhibits anti-diabetic effects

Geetanjali B. Gone <sup>1†</sup>, Geonhui Go <sup>1†</sup>, Gibeom Nam <sup>1</sup>, Woojoo Jeong <sup>1</sup>, Hyemin Kim <sup>1</sup>, Soah Lee <sup>1,2\*</sup> and Sang J. Chung <sup>1,2\*</sup>

1 Department of Biopharmaceutical Convergence, Sungkyunkwan University, Suwon 16419, Republic of Korea

2 School of Pharmacy, Sungkyunkwan University, Suwon 16419, Republic of Korea

\* Author to whom correspondence should be addressed.

† These authors contributed equally to this work

List of contents

|                                                                               |          |
|-------------------------------------------------------------------------------|----------|
| <b>Figure S1. Heat map showing the inhibitory data for PTPs.....</b>          | <b>2</b> |
| <b>Figure S2. PTPN6 Michalis-Menten plots and Lineweaver-Burk plots .....</b> | <b>3</b> |
| <b>Figure S3. PTPN9 Michalis-Menten plots and Lineweaver-Burk plots .....</b> | <b>4</b> |

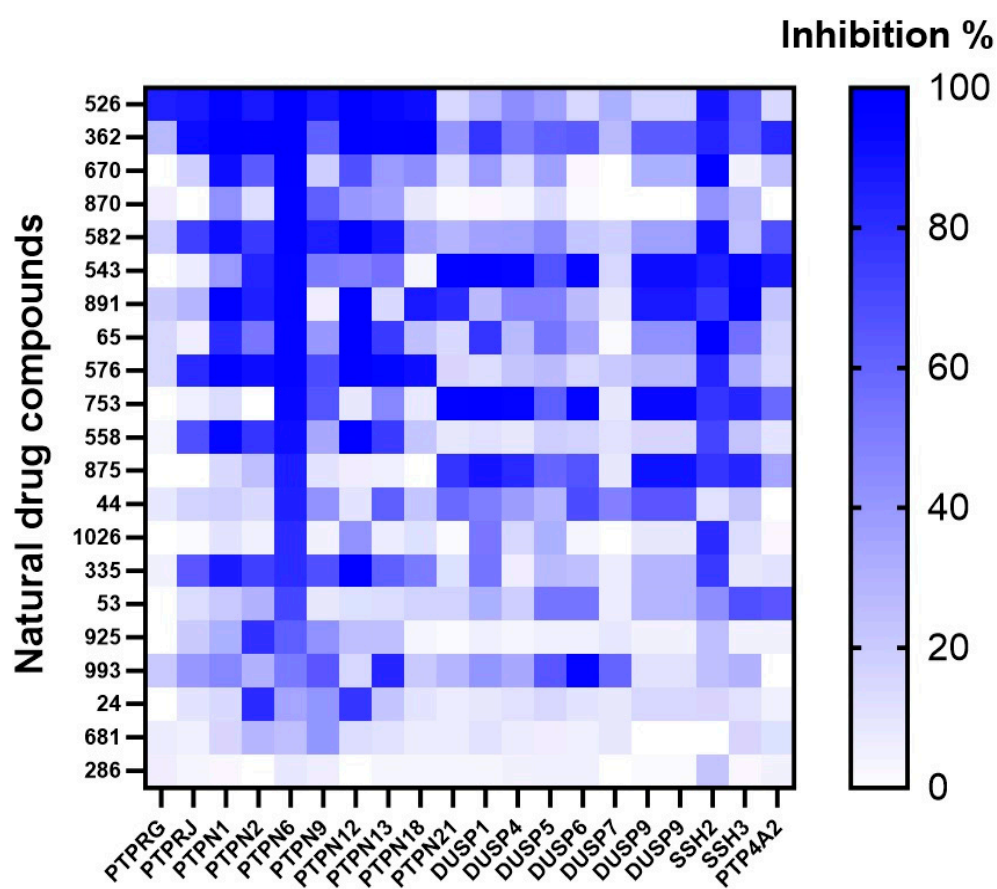

Figure S1: Heat map showing the effect of 20 natural compounds on 20 different PTPs. PTPs were added to solutions containing 20  $\mu\text{M}$  of drug compounds in a reaction buffer with DiFMUP ( $2 \times K_M$ ) and catalytic activity was measured. Compound Number 870 represents Quercitagitritin.

(a)

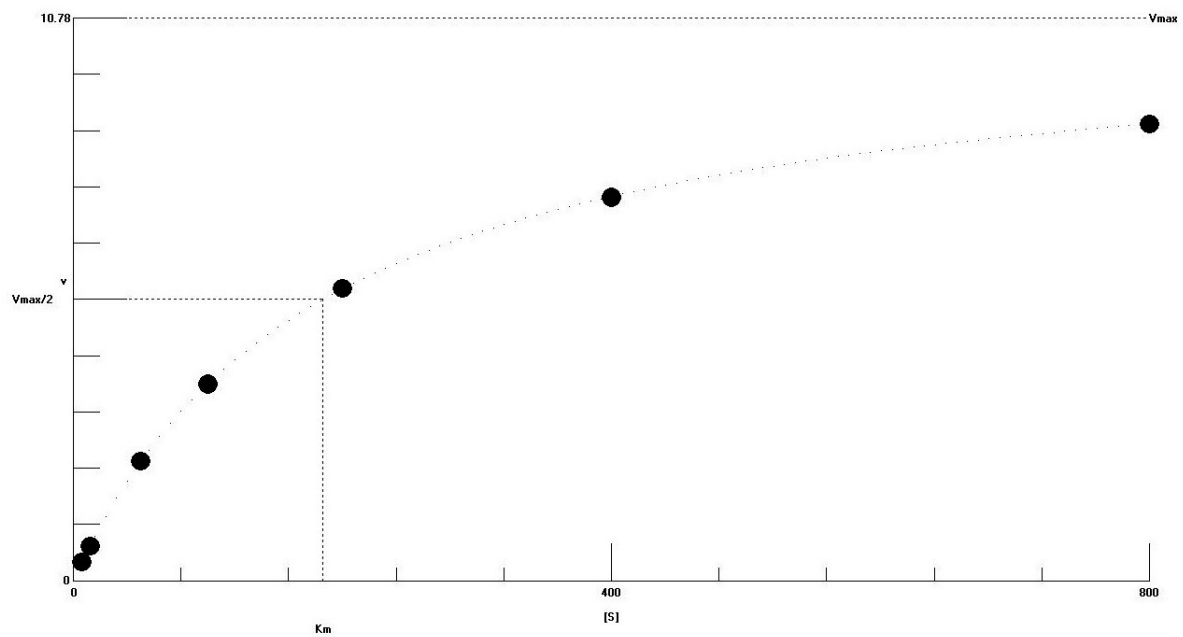

(b)

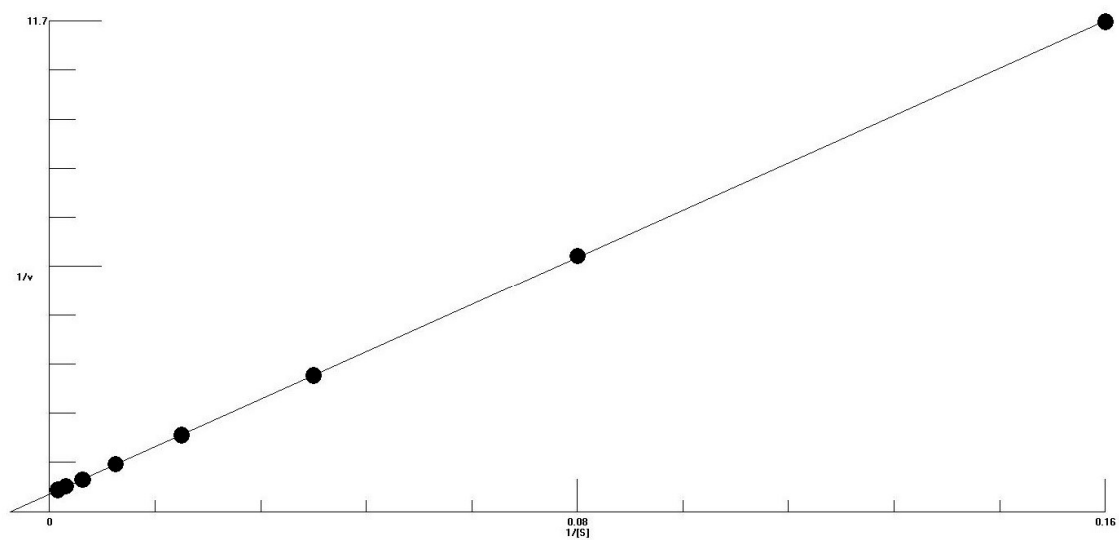

Figure S2. PTPN6 Michaelis–Menten plots (a) and Lineweaver–Burk plots (b) for the calculation of  $K_M$  and  $V_{max}$ . PTPN6 (6.0 nM) was added to the reaction buffer at various concentrations (800, 400, 200, 100, 50, 12.5, or 6.25  $\mu\text{M}$ )

(a)

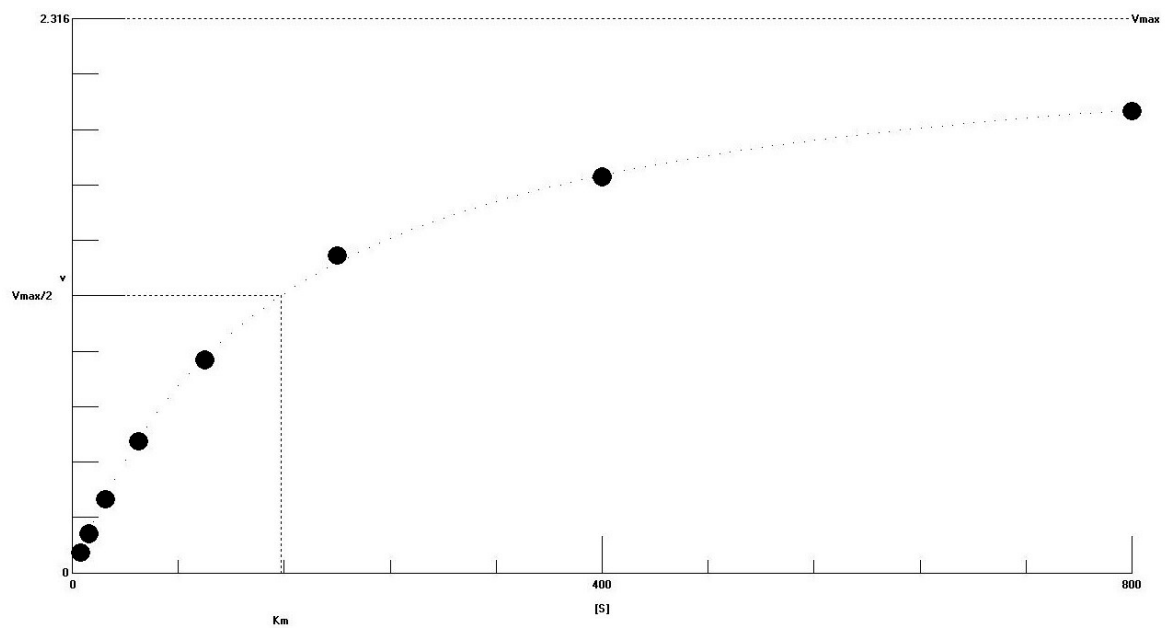

(b)

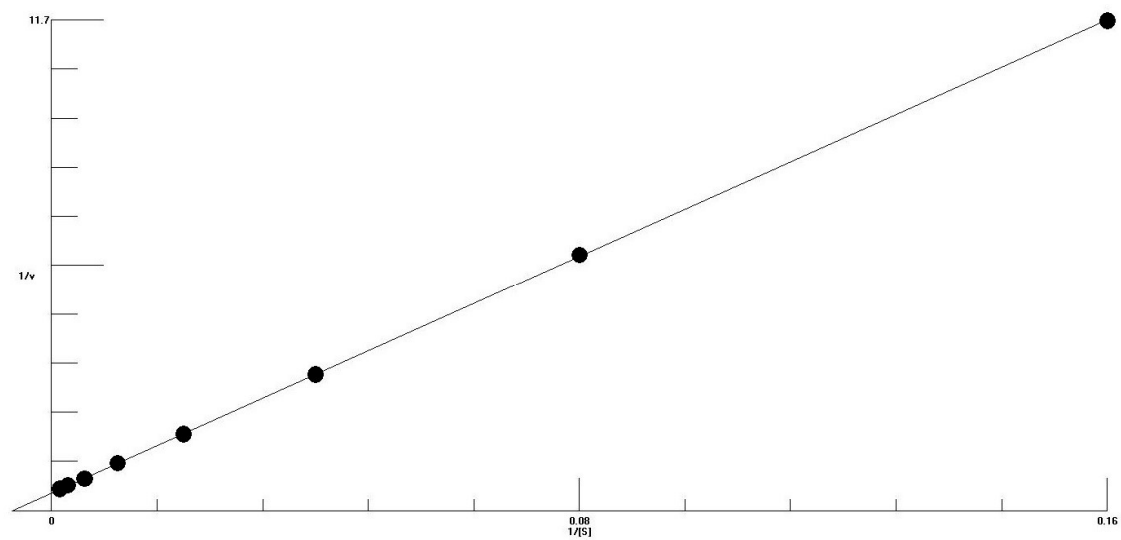

Figure S3. PTPN9 Michaelis–Menten plots (a) and Lineweaver–Burk plots (b) for the calculation of  $K_M$  and  $V_{max}$ . PTPN9 (0.05 nM) was added to the reaction buffer at various concentrations (800, 400, 200, 100, 50, 25, 12.5, or 6.25  $\mu\text{M}$ )
